# Supplementary material for: Genomic analysis of primordial dwarfism reveals novel disease genes
Source: HighWire-hosted journal article supplement (doi:10.1101/gr.160572.113), 2014-01-03
Supplement: Supplemental_Legends.docx [file Supplemental_Legends.docx]

Figure S1. A) Upper panel shows the pedigree and clinical photographs of PD_F1. Lower panel shows the sequence chromatograms of the nonsense mutation identified in *PCNT* in the index. B) Upper panel shows the pedigree and clinical photographs of PD_F2. Lower panel shows the sequence chromatograms of the missense mutation identified in *RBBP8.* D) Upper panel shows the pedigree and the clinical photographs of PD_F3. Lower panel shows the sequence chromatograms of the nonsense mutation identified in *CUL7*. E) Upper panel shows the pedigree and the clinical photographs of PD_F8. Lower panel shows the sequence chromatograms of the missense mutation identified in *IGF1*. The sites of mutations are denoted by asterisks.

Figure S2. Pedigrees and the clinical photographs of PD_F10, PD_F11, PD_12 and PD_F13 and PD_F14.
