# Supplementary material for: Genomic analysis of primordial dwarfism reveals novel disease genes
Source: HighWire-hosted journal article supplement (doi:10.1101/gr.160572.113), 2014-01-03
Supplement: Supplemental_Table1.docx [file Supplemental_Table1.docx]

Table S1: Clinical summary of the study patients.

| **Family ID** | | PD_F1 | PD_F2 | PD_F3 | PD_F4 | PD_F5 |
| --- | --- | --- | --- | --- | --- | --- |
| **Individual ID** | | IV:4 | V:3 | IV:2 | IV:2 | IV:4 |
| **Mutation** | | *PCNT*  [NM_006031.5:c.196G>T](https://mutalyzer.nl/check?name=NM_006031.5%28PCNT_v001%29%3Ac.196G%3ET); p.Gly66* | *RBBP8*  NM_203291.1: c.298C>T:p.R100W | *CUL7* NM_014780.4: c.2592T>G, p.Tyr864* | *CRIPT*  NM_014171.4, [c.133_134insGG](https://mutalyzer.nl/check?name=NM_014171%28CRIPT_v001%29%3Ac.133_134insGG), p.Ala45Glyfs*87 | *CRIPT*  NM_014171.4,  c.141delT  p.Phe47Leufs*84 |
| **Age** | | 12y 1m | 9y 4m | 6y | 3y 2m | 70d (deceased) |
| **Gender** | | M | F | M | M | M |
| **Birth growth parameters** | **Weight Kg** | 1.3 | 1.4 | 1.9 | 1.2 | 1.59 |
| **Length**  **cm** | ND | ND | ND | ND | ND |
| **OFC**  **cm** | ND | ND | ND | ND | ND |
| **Current growth parameters** | **Weight Kg** | 19 (-3.6SD) | 12.6 (-4.2SD) | 16.2 (-2SD) | 8.3 (-4.5SD) | 2.850 (-5SD) |
| **Length cm** | 103 (-6.4SD) | 66.4 (-6.2SD) | 94 (-4.2SD) | 77 (-5.3SD) | 50 (-4.3 SD) |
| **OFC**  **cm** | 45 (-5.9SD) | 47 (-4.1SD) | 51.5 (50th) | 45 (-2.5SD) | 35 (-2.7 SD) |
| **Clinical summary** | | Preterm, IUGR, delayed motor and speech development, high-pitched voice and recurrent chest infections | Microphthalmia, micrognathia, microglossia, and small teeth. Bilateral basal ganglia calcification and cerebellar calcification on brain MRI | Small and mal-aligned teeth, skin and joint laxity, and normal motor and cognitive development | Characteristic facies, hypoplastic terminal phalanges, osteopenia, blind, profound global developmental delay, hypopigmented skin patches and talipes. Bifrontal subdural hygroma on brain MRI | Characteristic facies,  hypoplastic terminal phalanges, osteopenia, albinoid fundus, markedly impaired retinal function, recurrent infections, PDA,  persistent anemia (Hb 8.3 g/dl) with anisopoikilocytosis. MRI showed increase white matter signal and hypogenesis of corpus callosum |

Table S1 (continued).

| **Family ID** | | PD_F6 | | PD_F7 | PD_F8 | |
| --- | --- | --- | --- | --- | --- | --- |
| **Individual ID** | | II:5 | III:1 | V:1 | IV:2 | IV:1 |
| **Mutation** | | *DNA2*  [NM_001080449.2](http://www.ncbi.nlm.nih.gov/entrez/query.fcgi?cmd=Search&db=Nucleotide&term=NM_001080449&doptcmdl=GenBank&tool=genome.ucsc.edu) :c.3372+6delC | | *BRCA2*  NM_000059.3: c.9152delC, p.Pro3051Hisfs*11 | *IGF1*  NM_001111285.1: c.292C>T: p.Arg98Trp | |
| **Age** | | 18y | 9y | 32m (deceased) | 2y 8m | 5y |
| **Gender** | | M | F | F | F | M |
| **Birth growth parameters** | **Weight Kg** | 1 (-4.1SD) | 1 (-4.6SD) | 1.6 (-3.5SD) | 1.6 (-3.5SD) | ND |
| **Length cm** | 37 (-4.9SD) | 38 (-5.1SD) | ND | ND | ND |
| **OFC**  **cm** | 24 | 24 | 29 (-3.9SD) | ND | ND |
| **Current growth parameters** | **Weight**  **Kg** | 19 (-5.6SD) | 10 (-4.8SD) | 6 (-6.8SD) | 8.2 (-4.1SD) | 9 (-4.9SD) |
| **Length**  **cm** | 104 (-9.5SD) | 97 (-6SD) | 72 (-5.3 SD) | 81 (-3.2SD) | 89 (-4.3SD) |
| **OFC**  **cm** | 44 (-7.5SD) | 38 (-11.8SD) | 39 (-6 SD) | 41 (-4.7SD) | 43.5 (-5.4SD) |
| **Clinical summary** |  | Characteristic Seckel facies, severe kyphoscoliosis leading to spinal cord compression and paraplegia, global developmental delay and intellectual disability | Characteristic Seckel facies, normal spine, global developmental delay and intellectual disability, and ectopic kidney | Global developmental delay, bilateral hip dysplasia, ectopic kidney, PDA, retinoblastoma and brain glioma, normal blood indices and bone marrow | Normal development and skeletal survey | Normal development and skeletal survey |

Table S1 (continued).

| **Family ID** | | PD_9 | PD_F10 | PD_11 | PD_F12 | PD_F13 | PD_F14 |
| --- | --- | --- | --- | --- | --- | --- | --- |
| **Individual ID** | | IV:1 | II:1 | VI:2 | V:3 | IV:2 | V:1 |
| **Mutation** | | *XRCC4*  NM_003401.3: c.127T>C; p.Trp43Arg | - | - | - | - | - |
| **Age** | | 4yr | 5y | 18m | 4y 3m | 2y 7m | 4y |
| **Gender** | | F | M | F | M | M | M |
| **Birth growth parameters** | **Weight**  **Kg** | 1.35 (-3.9SD) | 1.7 (-3SD) | 1.36 (-3.9SD) | 2 (-2.5SD) | 1.59 (-3.2SD) | 2 (-2.5SD) |
| **Length**  **cm** | ND | 41 (-3.4SD) | 36 (-6SD) | ND | 40 (-3.8SD) | ND |
| **OFC**  **cm** | ND | 24.5 (-5SD) | 27 (-5.3SD) | 29 (-3SD) | 27 (-15.4SD) | ND |
| **Current growth parameters** | **Weight**  **Kg** | 5.4 (-6.3SD) | 8.1 (-5.4SD) | 4.3 (-6.7SD) | 6.9 (-5.9SD) | 8.35 (-4.2SD) | 9.4 (-4.3SD) |
| **Length**  **cm** | 71 (-7.1SD) | 70 (-8.3SD) | 60.3 (-6.2SD) | 76.5 (-6.4SD) | 75 (-5SD) | 81.7 (-4.9SD) |
| **OFC**  **cm** | 36.8 (-8.3SD) | 32.3 (-13.5SD) | 37.5 (-6.8SD) | 37 (-9.1SD) | 36.5 (-7.9SD) | 47 (-2.3SD) |
| **Clinical summary** | | Normal motor development, speech delay, triangular bird-like face, and short philtrum | Congenital cataract, bilateral hip dysplasia, micropenis, global developmental delay. Severe microlissencephaly on MRI | Mild dysmorphism, and mild developmental delay | Mild dysmorphism, global developmental delay, epilepsy | Normal motor development, intellectual disability, and ADHD | Global developmental delay, mild dysmorphism, strabismus |
