# Supplementary material for: Genomic analysis of primordial dwarfism reveals novel disease genes
Source: HighWire-hosted journal article supplement (doi:10.1101/gr.160572.113), 2014-01-03
Supplement: Supplemental_Table2.xlsx [file Supplemental_Table2.xlsx]

## Sheet: Sheet1
Gene	Previsously published phenotypes	Phenotype in the current study
PCNT	PD	+
	Truncal obesity	+
	Prominent nose	+
	High pitched voice	+
	Diabetes	+
RBBP8	PD	+
	Retrognathia	+
	Limited supination	+
	(not reported)	Brain calcification
CUL7	PD	+
	Frontal bossing	+
	Triangular face	+
	Hypoplastic midface	+
	Full lips	+
	Joint hypermobility	+
	Normal development	+
IGF1	Short stature and microcephaly	PD
BRCA2	Short stature and microcephaly	PD
	Solid tumors	+
	Café au lait spots	+
	VATER association	-
