# Supplementary material for: Genomic analysis of primordial dwarfism reveals novel disease genes
Source: HighWire-hosted journal article supplement (doi:10.1101/gr.160572.113), 2014-01-03
Supplement: Supplemental_Table3.docx [file Supplemental_Table3.docx]

Table S2: Homozygous variants that remained after filtering in each of the exome sequenced patients

| **Comments** | **Variant**  **(protein level)** | **Variant**  **(cDNA level)** | **Reference sequence** | **Gene** | **Patient ID** |
| --- | --- | --- | --- | --- | --- |
| See text | p.Ala45Glyfs*87 | c.133_134insGG | NM_014171.4 | *CRIPT* | **PD_F4** |
| The mouse ortholog is a common site of retroviral integration in myeloid leukemia, and may function as a leukemia disease gene | p.His11Asn | c.31C>A | [NM_138559.1](http://www.ncbi.nlm.nih.gov/entrez/query.fcgi?cmd=Search&db=Nucleotide&term=NM_138559&doptcmdl=GenBank&tool=genome.ucsc.edu) | *BCL11A* |
| See text | See text and Figure 2 | c.3372+6delC | NM_001080449.2 | *DNA2* | **PD_F6** |
| See text | p.Pro3051Hisfs*11 | c.9152delC | NM_000059.3 | *BRCA2* | **PD_F7** |
| Incompatible phenotype in ko mouse (enhanced long-term potentiation, sensorimotor gating, and reward-based learning) | p.Asp272Glufs*3 | c.816delC | [NM_002162.3](http://www.ncbi.nlm.nih.gov/entrez/query.fcgi?cmd=Search&db=Nucleotide&term=NM_002162&doptcmdl=GenBank&tool=genome.ucsc.edu) | *ICAM3* |
| See text | p.Arg98Trp | c.292C>T | NM_001111285.1 | *IGF1* | **PD_F8** |
| Present as het once in 250 Saudi exomes | p.R958Q | c.2873G>A | NM_001033553 | *SPECC1* |
| See text | p.Trp43Arg | c.127T>C | NM_003401.3 | *XRCC4* | **PD_F9** |
| Incompatible phenotype in ko mouse (abnormal lymphatic system) | p.Ser419delinsArgAspCysThrValPheGlnPheIleAspPheLeuLeuTrpLysThrValLeuProGln | c.1257_1259del | NM_005429.2 | *VEGFC* |
| The gene is expressed at high levels throughout spermatogenesis and in mature sperms | p.Pro336Leu | c.1007C>T | NM_016248.3. | *AKAP11* |
| - | - | - | - | - | **PD_F10** |
| No available data | p.Glu315Asp | c.945A>C | NM_032437.2 | *EFCAB7* | **PD_F11** |
| Homozygous null mice have severe growth retardation, early lethality, and abnormal heart shape | p.Ser605Val | c.1814C>A | NM_001199143 | *XIRP2* |
| Truncates the last amino acid only | p.Trp552* | c.1655G>A | NM_001085447.1 | *C2orf77* |
| - | - | - | - | - | **PD_F12*** |
| No available data | p.Val137Leu | c.409G>C | NM_199328.2 | *CLDN8* | **PD_F13** |
| Present as het once in 250 Saudi exomes | p.Thr50Leufs*2 | c.147delC | NM_001037671.3 | *C12orf74* |
| - | - | - | - | - | **PD_F14** |

***present in the shared haplotype between the two parents who have affected children with PD within the same family**
