# Supplementary material for: Genomic analysis of primordial dwarfism reveals novel disease genes
Source: HighWire-hosted journal article supplement (doi:10.1101/gr.160572.113), 2014-01-03
Supplement: Supplemental_Table4.docx [file Supplemental_Table4.docx]

Table S3: Autozygome coordinates in the study families

| **PD_F4** | **PD_F3** | **PD_F2** | **PD_1** | **Family ID** |
| --- | --- | --- | --- | --- |
| | **chr1:76,090,137-77,307,376** | | --- | | **chr1:85,166,846-98,712,297** | | **chr2:36,450,589-137,628,373** | | **chr3:77,254,167-79,680,680** | | **chr4:5,642,349-6,978,372** | | **chr5:29,115,252-35,521,480** | | **chr5:73,973,262-75,603,754** | | **chr5:97,333,988-102,940,146** | | **chr5:157,110,797-171,419,509** | | **chr6:112,510-5,754,159** | | **chr6:8,205,335-17,768,234** | | **chr6:75,425,044-93,908,183** | | **chr6:108,133,010-134,417,281** | | **chr6:147,329,532-149,945,290** | | **chr8:15,412,408-16,783,037** | | **chr10:56,093,974-57,583,741** | | **chr10:63,626,238-64,954,609** | | **chr12:4,143,597-5,392,817** | | **chr12:71,293,513-73,737,494** | | **chr12:99,964,845-101,646,014** | | **chr14:95,621,356-100,186,757** | | **chr15:60,731,740-65,205,259** | | **chr16:82,478,391-83,952,115** | | **chr18:33,397,351-35,233,151** | | **chr19:35,675,949-41,364,223** | | **chr20:17,833,751-36,335,089** | | | **chr1:201,188,817-211,165,252** | | --- | | **chr2:195,548,645-216,891,730** | | **chr3:60,462,221-61,613,198** | | **chr3:140,331,589-158,728,920** | | **chr5:88,931,328-118,642,841** | | **chr6:32,901,959-45,638,646** | | **chr8:82,208,031-103,353,851** | | **chr14:26,291,675-33,767,822** | | **chr14:44,320,168-72,013,505** | | **chr16:19,068,960-54,437,527** | | **chr17:10,206,091-45,298,460** | | **chr18:6,833,259-27,190,831** | | **chr20:13,236,793-38,877,269** | | | **chr1:30,763,287-34,125,328** | | --- | | **chr1:57,544,442-59,379,009** | | **chr1:70,042,099-89,188,164** | | **chr1:159,925,114-160,988,776** | | **chr1:180,308,602-182,055,193** | | **chr2:49,529,832-50,616,765** | | **chr2:118,643,425-132,050,411** | | **chr2:163,707,898-165,151,373** | | **chr2:173,975,654-181,048,216** | | **chr3:81,408,551-97,423,813** | | **chr3:163,397,278-166,463,232** | | **chr4:61,566-5,128,063** | | **chr4:189,437,713-190,960,381** | | **chr5:62,521,934-65,585,990** | | **chr5:103,618,989-105,952,315** | | **chr5:173,957,671-180,618,506** | | **chr6:28,511,582-29,728,986** | | **chr6:47,419,368-50,901,036** | | **chr6:114,268,850-117,768,244** | | **chr7:70,871,607-78,310,372** | | **chr7:147,328,973-150,726,064** | | **chr8:175,668-3,146,502** | | **chr8:35,490,602-40,940,289** | | **chr9:2,140,504-2,675,764** | | **chr9:32,275,225-33,144,108** | | **chr9:91,376,998-94,118,443** | | **chr10:4,485,777-5,959,812** | | **chr10:53,593,631-54,346,676** | | **chr10:110,838,157-112,574,078** | | **chr11:12,137,118-19,917,212** | | **chr11:29,960,814-34,305,920** | | **chr11:77,392,394-79,823,679** | | **chr13:71,326,648-73,416,031** | | **chr14:43,161,424-47,608,194** | | **chr14:80,814,905-90,690,907** | | **chr16:17,042,950-23,179,497** | | **chr16:52,915,171-57,035,572** | | **chr17:70,080,896-75,823,064** | | **chr18:2,177,235-6,828,464** | | **chr18:13,000,000-19,471,000** | | **chr19:43,294,054-50,790,725** | | **chr21:16,457,691-21,712,790** | | | **chr1:206,861,077-212,546,116** | | --- | | **chr2:136,759,336-138,151,484** | | **chr2:172,690,020-216,246,901** | | **chr2:237,892,333-242,536,018** | | **chr3:155,963,022-175,409,883** | | **chr8:29,412,995-70,786,926** | | **chr10:123,566,469-131,691,815** | | **chr12:44,311,490-66,959,699** | | **chr12:71,721,351-73,118,921** | | **chr13:100,260,399-103,182,164** | | **chr14:20,701,338-26,805,973** | | **chr14:53,679,990-64,099,534** | | **chr17:0-2,924,356** | | **chr18:6,079,087-28,71502,332** | | **chr18:34,049,333-46,169,507** | | **chr19:4,803,137-16,929,524** | | **chr19:46,507,298-49,067,005** | | **chr21:42,969,063-48,090,629** | | **Region of Homozygosity (NCBI36/hg18)** |
